# Supplementary material
Source: Springer Nature journal article supplement (https://www.springerprofessional.de/resource/supplementary/13638_2011_314_MOESM24_ESM.pdf/11897560)
Supplement: MOESM24 [file 11897560]

AODV



(a)

AODV\_DT



(b)

AODV\_CZ



(c)

AODV\_DT\_OFc



(d)
